# Supplementary material
Source: PubMed Central journal article supplement (PMC2923428)
Supplement: NIHMS134723-supplement-Table.pdf [file NIHMS134723-supplement-Table.pdf]

Table S1 Total Thymocytes Number (million)

---

|     |            |      |
|-----|------------|------|
| f/+ | 121.7±33.8 | n=12 |
| f/- | 122.3±40.6 | n=12 |

---
